# Supplementary material
Source: Springer Nature journal article supplement (https://www.springermedizin.de/resource/supplementary/13063_2010_707_MOESM2_ESM.pdf/9618528)
Supplement: MOESM2 [file 9618528]

## SERVICE LEVEL

*Specialist dental support; Hospital support*

## STAFF LEVEL

*All MDT members including nursing staff and clinical support workers.*

## PATIENT LEVEL

*All dentition profiles, all cognitive states.*

### INTERVENTIONS

- Specialist Dental Support
- Provision of OHC equipment
- Provision of OHC products

### INTERVENTIONS

- Training x 2hrs by Specialist
- OHC Assessment
- OHC Protocol
- OHC Equipment
- OHC Products

### INTERVENTIONS

- Specialist trained staff
- Individualised assessment
- Individualised care plan
- Appropriate equipment
- Oral health promotion

**Optimum  
Oral  
Health  
Care**

### Feasibility:

Referrals to dental support  
(Urgent & non-urgent)

### Measures:

Number and nature of referrals

### Feasibility:

Qualitative Interviews  
MDT support  
Equipment Use  
Assessment Tool  
Completion  
Documented Care Plans

### Measures:

Knowledge & Attitudes  
Questionnaire

### Feasibility:

Qualitative Interviews

### Measures:

Plaque (dental/ denture)  
OHC Quality of Life  
Chest Infection  
[On admission & weekly up to 3 months or discharge]
